# Supplementary material for: Combing δ15N and δ18O to identify the distribution and the potential sources of nitrate in human-impacted watersheds, Shandong, China
Source: Royal Society of Chemistry journal article supplement (doi:10.1039/c8ra04364g), 2018-01-01
Supplement: c8ra04364g1.pdf [file c8ra04364g1.pdf]

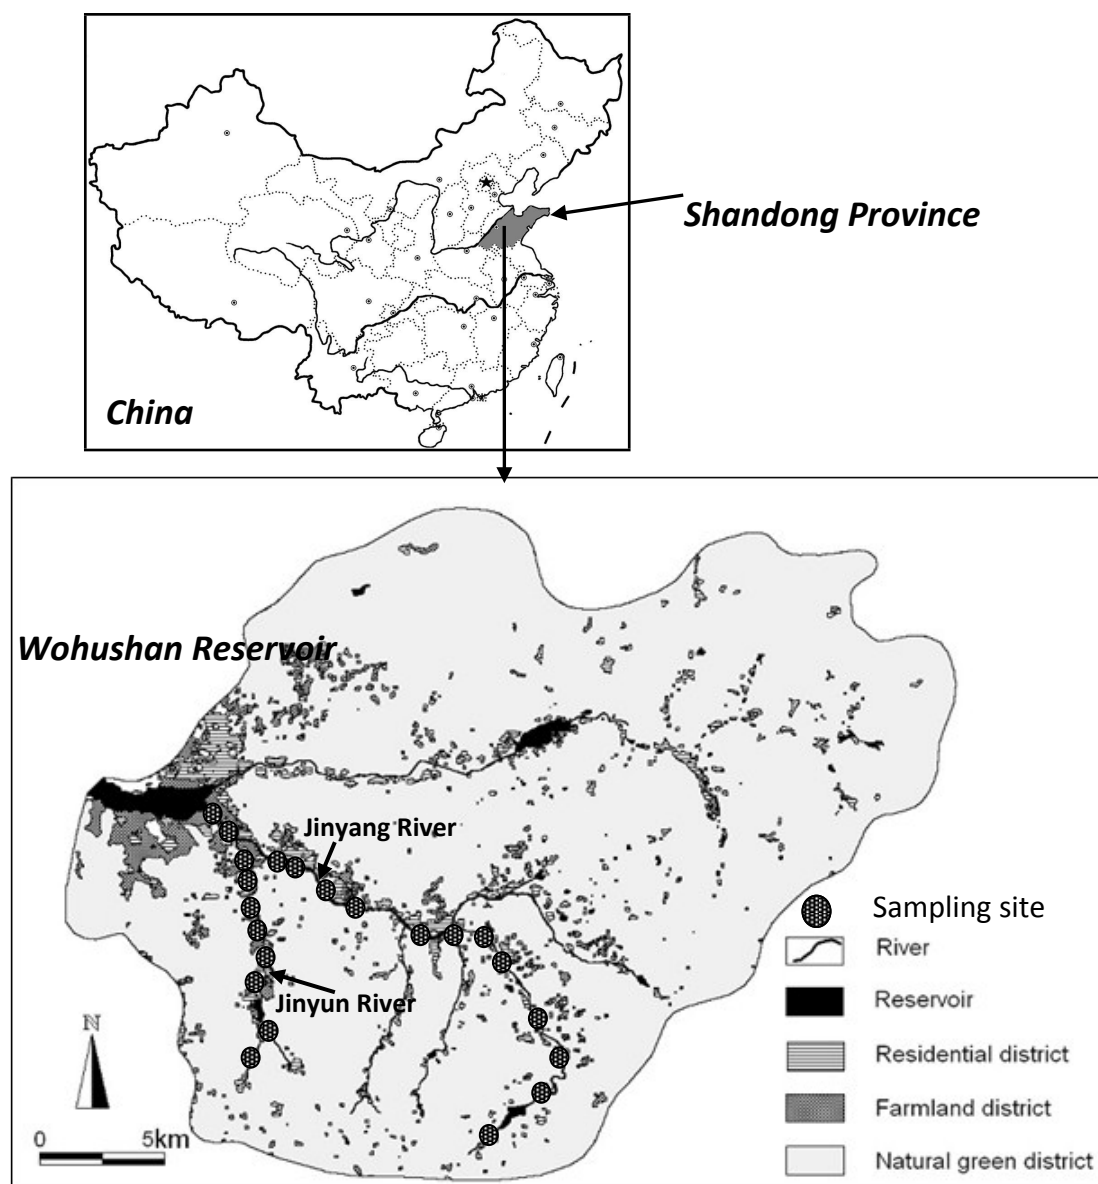

**Fig. S1 Site map for the Jinyun and Jinyang rivers. The water samples were collected at the upstream Jiyun River (JYU-U), the downstream Jiyun River (JYU-D), the upstream Jiyang River (JYA-U), the middle reach of Jiyang River (JYA-M), the downstream Jiyang River (JYA-D), and the integrated channel (IntC)**
